# Sensitive Troponins – Which Suits Better for Hemodialysis Patients? Associated Factors and Prediction of Mortality

Ferruh Artunc<sup>1\*</sup>, Christian Mueller<sup>2</sup>, Tobias Breidhardt<sup>2</sup>, Raphael Twerenbold<sup>2</sup>, Andreas Peter<sup>1</sup>, Claus Thamer<sup>1</sup>, Peter Weyrich<sup>1</sup>, Hans-Ulrich Haering<sup>1</sup>, Bjoern Friedrich<sup>1,3</sup>

**1** Department of Internal Medicine, Division of Endocrinology, Diabetology, Vascular Disease, Nephrology and Clinical Chemistry, University of Tuebingen, Germany, **2** Department of Internal Medicine, Division of Cardiology, University of Basel, Basel, Switzerland, **3** Dialysis Center, Leonberg, Germany

## Abstract

**Background:** In hemodialysis patients, elevated plasma troponin concentrations are a common finding that has even increased with the advent of newly developed sensitive assays. However, the interpretation and relevance of this is still under debate.

**Methods:** In this cross-sectional study, we analyzed plasma concentrations of sensitive troponin I (TnI) and troponin T (TnT) in stable ambulatory hemodialysis patients (n = 239) and investigated their associations with clinical factors and mortality.

**Results:** In all of the enrolled patients, plasma TnI or TnT was detectable at a median concentration of 14 pg/ml (interquartile range: 7–29) using the Siemens TnI ultra assay and 49 pg/ml (31–74) using the Roche Elecsys high sensitive TnT assay. Markedly more patients exceeded the 99th percentile for TnT than for TnI (95% vs. 14%,  $p < 0.0001$ ). In a multivariate linear regression model, TnT was independently associated with age, gender, systolic dysfunction, time on dialysis, residual diuresis and systolic blood pressure, whereas TnI was independently associated with age, systolic dysfunction, pulse pressure, time on dialysis and duration of a HD session. During a follow-up period of nearly two years, TnT concentration above 38 pg/mL was associated with a 5-fold risk of death, whereas elevation of TnI had a gradual association to mortality.

**Conclusion:** In hemodialysis patients, elevations of plasma troponin concentrations are explained by cardiac function and dialysis-related parameters, which contribute to cardiac strain. Both are highly predictive of increased risk of death.

**Citation:** Artunc F, Mueller C, Breidhardt T, Twerenbold R, Peter A, et al. (2012) Sensitive Troponins – Which Suits Better for Hemodialysis Patients? Associated Factors and Prediction of Mortality. PLoS ONE 7(10): e47610. doi:10.1371/journal.pone.0047610

**Editor:** Wolf-Hagen Schunck, Max Delbrueck Center for Molecular Medicine, Germany

**Received:** July 9, 2012; **Accepted:** September 19, 2012; **Published:** October 15, 2012

**Copyright:** © 2012 Artunc et al. This is an open-access article distributed under the terms of the Creative Commons Attribution License, which permits unrestricted use, distribution, and reproduction in any medium, provided the original author and source are credited.

**Funding:** These authors have no support or funding to report.

**Competing Interests:** The authors have declared that no competing interests exist.

\* E-mail: ferruh.artunc@med.uni-tuebingen.de

## Introduction

Elevations of cardiac troponins in the plasma define are indicative of myocardial injury and necrosis [1]. According to the universal definition of myocardial infarction (MI) published in 2007, MI can be diagnosed based on a rise and fall in the plasma troponin concentrations above the 99<sup>th</sup> percentile when there is evidence of myocardial ischemia [2]. However, in patients with end-stage renal failure (ESRD), chronic elevations at the subclinical level have been shown to occur without signs of myocardial ischemia [3–5]. Several longitudinal studies have consistently shown that elevated troponin concentrations in ESRD patients add prognostic information and are associated with increased mortality [6–10]. A meta-analysis concluded that increases in plasma troponin T or troponin I concentrations conferred a 2.64 or 1.74-fold increase, respectively, in mortality risk in ESRD patients [11]. The current view is that an elevated troponin concentration reflects chronic myocardial strain and damage during the course of renal failure and ESRD [12] rather

than reduced clearance [13] or cross-reactivity with troponins from skeletal muscle [14,15]. The cardiac work load of ESRD patients is greatly increased by several conditions, such as hypertension, shunt flow, chronic extracellular volume expansion, anemia or increased pulse pressure. These factors induce profound alterations in cardiac structure [16] and may lead to subsequent troponin release. In addition to a chronically increased cardiac work load, acute hemodialysis sessions induce cardiac stress due to circulatory alterations and may trigger myocardial stunning [17].

Typically, plasma troponin concentrations in ESRD patients are slightly elevated above the 99<sup>th</sup> percentile touching the lower detection limit of many troponin assays employed in routine diagnostics. At this point, the analytical precision of conventional troponin measurements is reduced, and the coefficient of variation (CV) can reach 10–20% [18]. To overcome this problem, sensitive assays with a CV of <10% at the 99<sup>th</sup> percentile have been developed and have shown improved accuracy in the diagnosis of MI [19]. Some of these tests can be designated as highly sensitive based on a high proportion (>50%) of subjects with measurable

**Table 1.** Patient characteristics of the cohort (n = 239).

|                              |                                |                                            |
|------------------------------|--------------------------------|--------------------------------------------|
| median age                   |                                | 70 (61; 77) years (n = 239)                |
| gender distribution          |                                | 64% male (n = 153)/36% female (n = 86)     |
| renal disease                | diabetic nephropathy           | 26% (n = 63)                               |
|                              | hypertension                   | 8% (n = 19)                                |
|                              | glomerulonephritis             | 30% (n = 71)                               |
|                              | polycystic disease             | 5% (n = 11)                                |
|                              | other/unknown                  | 31% (n = 75)                               |
| cardiac comorbidities        | coronary heart disease         | 31% (n = 74)                               |
|                              | revascularized                 | 19% (n = 31)                               |
|                              | valvular heart disease         | 26% (n = 61)                               |
|                              | atrial fibrillation            | 23% (n = 55)                               |
|                              | pulmonary hypertension         | 7% (n = 16)                                |
|                              | AICD carrier                   | 2% (n = 4)                                 |
| other comorbidities          | diabetes mellitus              | 38% (n = 90)                               |
|                              | peripheral vascular disease    | 33% (n = 80)                               |
|                              | stroke                         | 16% (n = 38)                               |
|                              | vasculitis                     | 3% (n = 8)                                 |
|                              | malignoma                      | 14% (n = 34)                               |
|                              | COPD                           | 8% (n = 19)                                |
| length of time on dialysis   |                                | 46 (19; 85) months (n = 239)               |
| duration of dialysis session |                                | 4.0 (4.0; 4.5) hours (n = 239)             |
| dialysis access              | arteriovenous fistula          | 71% (n = 169)                              |
|                              | PTFE graft                     | 13% (n = 31)                               |
|                              | tunneled catheter              | 16% (n = 38)                               |
| dialysis membrane            | high-flux                      | 92% (n = 219)                              |
|                              | low-flux                       | 8% (n = 20)                                |
| residual diuresis            |                                | 250 (0; 1000) mL/day (n = 239)             |
| anuric patients              |                                | 39% (n = 93)                               |
| interdialytic weight gain    |                                | 1.85 (1.29; 2.47) kg (n = 239)             |
| blood pump speed             |                                | 300 (280; 340) mL/min (n = 239)            |
| shunt flow                   |                                | 1080 (733; 1475) mL/min (n = 187)          |
| blood pressure               |                                | 134 (122; 144)/69 (63; 74) mm Hg (n = 239) |
| pulse pressure               |                                | 65 (54; 74) mm Hg (n = 239)                |
| single pool Kt/V             |                                | 1.55 (1.40; 1.73) (n = 239)                |
| laboratory data              | hemoglobin                     | 11.5 (11.1; 12.0) g/dL (n = 239)           |
|                              | C-reactive protein             | 8.6 (4.6; 15.0) mg/L (n = 239)             |
|                              | albumin                        | 37.1 (35.4; 39.3) g/L (n = 239)            |
|                              | parathormone                   | 204 (130; 348) pg/mL (n = 239)             |
|                              | $\beta$ 2-microglobulin        | 23.4 (19.4; 25.4) mg/L (n = 239)           |
| LV systolic function         | normal                         | 59% (n = 140)                              |
|                              | mildly reduced                 | 13% (n = 32)                               |
|                              | moderately or severely reduced | 12% (n = 29)                               |
|                              | unknown                        | 16% (n = 38)                               |

Values shown are the median and interquartile range. N indicates number of patients from which data were available.

abbreviations:

PTFE = polytetrafluorethylene, LV = left ventricle, AICD = automated implantable cardioverter-defibrillator.

doi:10.1371/journal.pone.0047610.t001

values that fall below the 99<sup>th</sup> percentile [18,20]. Currently, only few clinically available assays, such as the Roche Elecsys high sensitive (hs) TnT, fulfill this criterion [18]. There are only a few studies that have applied sensitive troponin assays in ESRD

patients [21–23]. In one study, sensitive troponin T was found to be the most powerful predictor of mortality in ESRD patients among other established cardiac biomarkers [22].

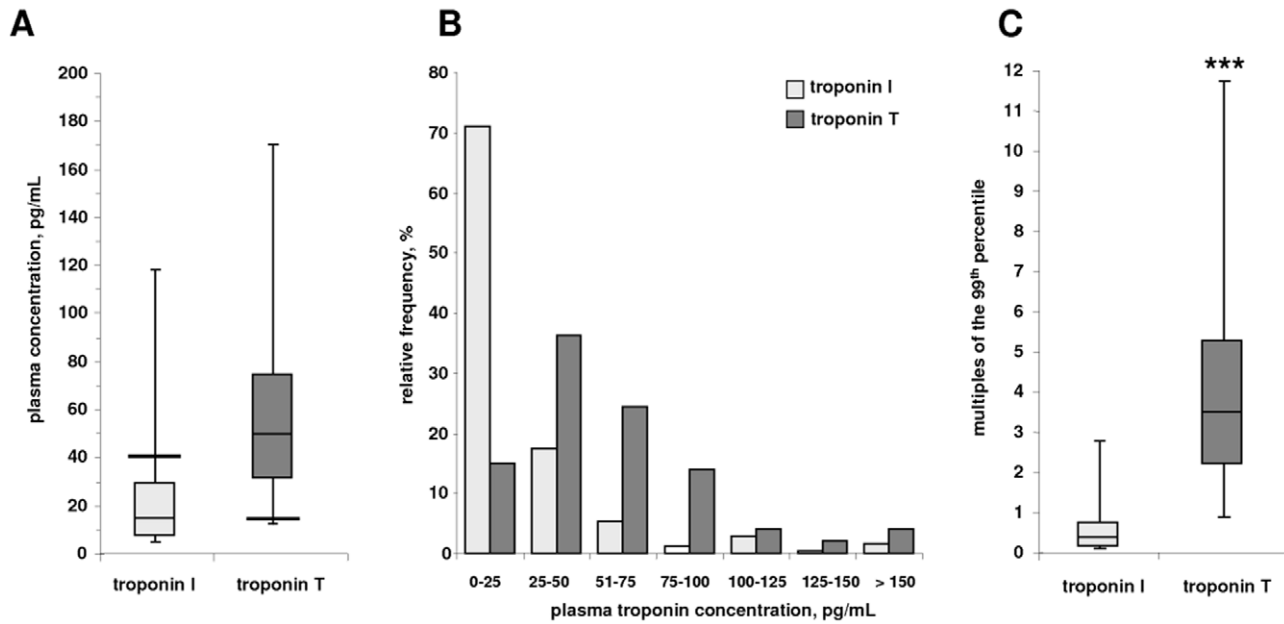

**Figure 1. Depiction of the plasma troponin I and T concentrations in the cohort.** **A** Box-and-Whiskers-Plot of the plasma troponin I and T concentrations indicating the median, interquartile range and the range between the 2.5<sup>th</sup> and 97.5<sup>th</sup> percentile. Solid lines represent the 99<sup>th</sup> percentile of the assay [19]. **B** Distribution of the plasma troponin I and T concentrations in the cohort (n = 239). **C** Box-and-Whiskers-Plot of the plasma troponin I and T concentrations expressed as multiples of the 99<sup>th</sup> percentile [19]. \*\*\* indicates a significant difference (p < 0.0001) between the troponin T and troponin I concentrations. doi:10.1371/journal.pone.0047610.g001

With the advent of sensitive assays, cardiac troponins are now detected to a larger extent in hemodialysis patients raising questions about interpretation and relevance to nephrologists and cardiologists alike. The increased sensitivity and resolution of the assays, however, also improve the chance to identify factors that are associated with elevated plasma troponin concentrations, such as loss of residual renal function [24] or volume overload [25], both of which contribute to cardiac strain and are predictive of increased mortality. Since both troponins (I and T) can be measured with sensitive assays, results might also reflect different biochemical properties. Therefore, we measured both troponin I and T with sensitive assays in a comparative approach to investigate associated factors and to analyze the diagnostic performance in predicting death during a follow-up period of two years.

## Methods

### Patients and cohort

This cross-sectional, prospective multicenter study was conducted in stable, ambulatory hemodialysis patients from four dialysis centers in southwest Germany between September 2009 and April 2010. Patients without evidence of an acute illness and cardiac event or procedure within two months were included in the study after providing written informed consent. Patients with cardiac diseases leading to increased plasma troponin concentrations independent of ESRD, such as amyloidosis, were excluded. The study was approved by the local ethics committee of the University hospital Tuebingen.

### Laboratory assays

Plasma concentrations of troponin I and troponin T were measured in three independent samples collected within two weeks. Each sample was collected prior to the start of a dialysis

**Table 2. Univariate correlations (Pearson's r) of the plasma troponin concentration with general and dialysis-specific parameters (n = 210–239).**

|                                 | troponin I, pg/ml | troponin T, pg/ml |
|---------------------------------|-------------------|-------------------|
| age, y                          | 0.32 ***          | 0.43 ***          |
| systolic LVF, classes           | 0.44 ***          | 0.38 ***          |
| time on dialysis, months        | 0.15 *            | 0.18 **           |
| residual diuresis, ml/day       | -0.13 *           | -0.29 ***         |
| interdialytic weight gain, kg   | 0.13 *            | 0.25 **           |
| shunt flow, ml/min              | -0.16 *           | -0.14 #           |
| systolic blood pressure, mm Hg  | 0.11 #            | n.s.              |
| diastolic blood pressure, mm Hg | -0.13 *           | -0.19 **          |
| pulse pressure, mm Hg           | 0.21 *            | 0.22 **           |
| duration of a HD session        | n.s.              | n.s.              |
| blood pump speed, ml/min        | n.s.              | 0.15 *            |
| Kt/V                            | n.s.              | n.s.              |
| hemoglobin, g/dL                | n.s.              | n.s.              |
| plasma albumin, g/L             | n.s.              | n.s.              |
| C-reactive protein, mg/L        | n.s.              | 0.21 **           |
| parathormone, pg/mL             | 0.16 *            | 0.14 *            |
| $\beta$ 2-microglobulin, mg/dL  | n.s.              | n.s.              |

#p < 0.10, \* p < 0.05, \*\* p < 0.01, \*\*\* p < 0.001, n.s. = not significant (p > 0.10). doi:10.1371/journal.pone.0047610.t002

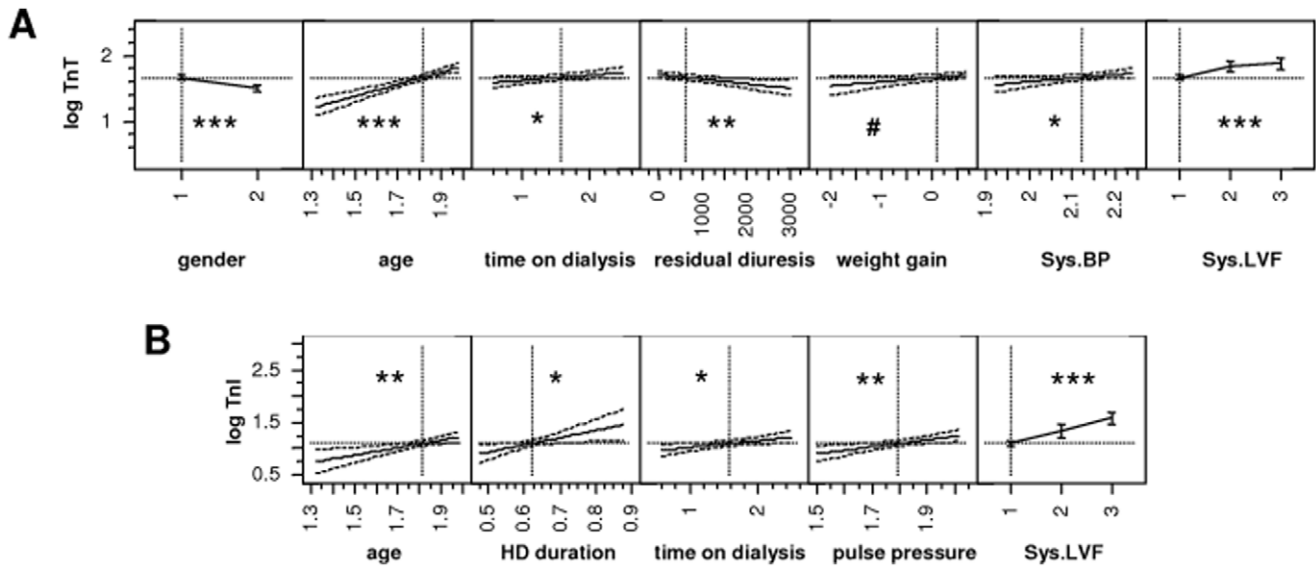

**Figure 2. Plot showing the influence of single predictors in the multivariate model for troponin T (A) and troponin I (B).** #  $p < 0.10$ , \*  $p < 0.05$ , \*\*  $p < 0.01$ , \*\*\*  $p < 0.001$ .  
doi:10.1371/journal.pone.0047610.g002

session. Blood was collected in lithium-heparinized tubes (Sarstedt, Nuembrecht, Germany), cooled at  $4^{\circ}\text{C}$ , and centrifuged within 4 hours. The sera were stored at  $-80^{\circ}\text{C}$  until further analysis. Plasma concentrations of troponin I were measured using the Troponin I Ultra assay on a Siemens ADVIA Centaur system (Siemens Healthcare Diagnostics, Eschborn, Germany) with a detection limit of 6 pg/ml, a 99<sup>th</sup> percentile at 40 pg/ml, and a CV of less than 10% at 30 pg/ml, as specified by the manufacturer. Plasma concentrations of troponin T were measured using an automated Roche assay on an Elecsys 2010 system with a detection limit of 2 pg/ml, a 99<sup>th</sup> percentile at 14 pg/ml, and a coefficient of variation of less than 10% at 13 pg/ml [19]. Plasma beta-2-microglobulin concentrations were measured using a turbidimetric assay (Randox Laboratories, Antrim,

United Kingdom) on a Siemens ADVIA 1800 system with a measurable range between 0.56–20.9 mg/l and an upper reference concentration of 3 mg/l [26]. All other laboratory values (parathormone, hemoglobin, albumin and C-reactive protein) were extracted from the patients' medical records and represent an average of the available values from the previous year (4–12 values).

#### Clinical data

The following data were extracted from each patient: residual diuresis, as measured by 24 h urine collection: single pool Kt/V (mean of the most recent 4 values collected), interdialytic weight gain, predialytic systolic and diastolic blood pressure (mean of the most recent 12 values), dialysis access and membrane, length of

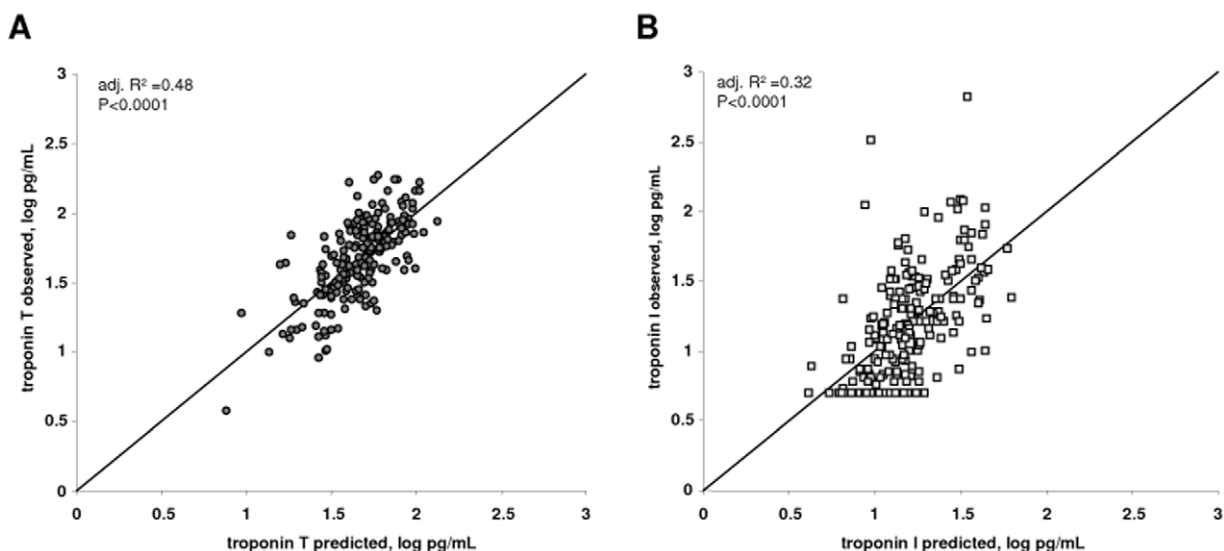

**Figure 3. Agreement between predicted and observed log troponin I and T concentrations.** Plot of the predicted and observed troponin values for troponin T (A) and troponin I (B) as a result of the models shown in table 4. The diagonal line represents the line of identity.  
doi:10.1371/journal.pone.0047610.g003

**Table 3.** Independent factors determining plasma troponin concentrations by multivariate linear modeling (n = 201).

|                          | covariate                       | estimate ± SD                           | standardized estimate ± SD | p-value |
|--------------------------|---------------------------------|-----------------------------------------|----------------------------|---------|
| <b>troponin T, pg/ml</b> | y-intercept                     | -1.25±0.61                              | 1.59±0.02                  | 0.0410  |
|                          | age, y                          | 0.84±0.14                               | 0.27±0.05                  | <.0001  |
|                          | systolic LVF, classes [2 vs. 1] | 0.14±0.04                               | 0.14±0.04                  | 0.0016  |
|                          | systolic blood pressure, mmHg   | 0.55±0.27                               | 0.09±0.04                  | 0.0432  |
|                          | residual diuresis, ml/24 h      | -6 10 <sup>-5</sup> ±2 10 <sup>-5</sup> | -0.09±0.03                 | 0.0050  |
|                          | gender [1 = male]               | 0.08±0.02                               | 0.08±0.02                  | <.0001  |
|                          | interdialytic weight gain, kg   | 0.06±0.03                               | 0.07±0.04                  | 0.0688  |
|                          | time on dialysis, months        | 0.08±0.04                               | 0.07±0.04                  | 0.0395  |
|                          | systolic LVF, classes [3 vs. 2] | 0.04±0.27                               | 0.06±0.06                  | 0.4715  |
|                          | atrial fibrillation [1 = yes]   | 0.08±0.04                               | 0.04±0.02                  | 0.0324  |
| <b>troponin I, pg/ml</b> | y-intercept                     | -2.32±0.69                              | 1.10±0.03                  | 0.0009  |
|                          | duration of a HD session, h     | 1.30±0.58                               | 0.26±0.12                  | 0.0274  |
|                          | systolic LVF, classes [3 vs. 2] | 0.22±0.07                               | 0.25±0.08                  | 0.0042  |
|                          | systolic LVF, classes [2 vs. 1] | 0.25±0.08                               | 0.22±0.07                  | 0.0013  |
|                          | age, y                          | 0.62±0.24                               | 0.20±0.08                  | 0.0104  |
|                          | pulse pressure, mm Hg           | 0.71±0.24                               | 0.18±0.06                  | 0.0032  |
|                          | time on dialysis, months        | 0.11±0.06                               | 0.11±0.05                  | 0.0410  |
|                          | valvular disease [1 = yes]      | 0.10±0.06                               | 0.05±0.03                  | 0.0767  |

doi:10.1371/journal.pone.0047610.t003

time on dialysis, blood pump flow and shunt flow measured using a Transonic system (Ithaca, NY, USA). The left ventricular (LV) systolic function was classified from available echocardiography examinations in which class 1 indicated normal function, 2 was mildly reduced, and 3 was moderately or severely reduced. Determination of the LV systolic function was done at the discretion of the cardiologist and not standardized. Echocardiography was available in 84% of all patients within one year (plus-minus) relative to study enrollment.

### Statistical analysis

Three samples were available in 87% of the patients and were averaged to calculate the arithmetic mean without excluding possible outliers. For further analysis, plasma troponin concentrations and continuous clinical data were log transformed to approximate normal distribution. The association of the plasma troponin concentrations with clinical or dialysis-related factors was analyzed by univariate parametric correlation. Multivariate linear regression analyses were performed to identify independent determinants of the plasma troponin concentrations. Selection of the variables entering the model were derived from forward, stepwise multiple linear regression, and all variables with a p-value <0.05 were included in the multivariate linear regression models. The residuals of each model were tested for normality. Averaged values of the deceased patients were compared to those from the surviving patients using t-Test or Wilcoxon's test. Kaplan-Meier curves were generated after stratification into tertiles of the variable according to its distribution. The follow-up period started on the first day of blood draw and was censored as of 31 December 2011. The diagnostic performance was analyzed using receiver-operator curves (ROC or c-index) and the best cut-off value was considered as the maximal difference of sensitivity and 1-specificity (Youden index). C-Index was calculated using Wessa, P. (2012), Free Statistics Software, Office for Research Develop-

ment and Education, version 1.1.23-r7, <http://www.wessa.net/>. Univariate and multivariate proportional hazards were calculated to analyze the risk ratios of each predictor and the independence of the predictors. Data analysis was performed using the statistical software package JMP 10.0.1 (SAS Institute, Cary, NC).

## Results

### Patients

Of the n = 250 available patients that were treated in the participating centers, n = 239 were included in the study. The reasons for exclusion of the n = 11 patients were the following: patients declined to participate (n = 6), deaths occurred following the initial plasma collection (n = 2), cardiac amyloidosis (n = 2) and a recent enrollment in dialysis (n = 1). The characteristics of the study cohort are provided in table 1. Participants were primarily geriatric, with a median age of 70. They had been in a dialysis-dependent state for a median of 45 months and were dialyzed mainly using an arteriovenous (AV) fistula (71%) or a high flux membrane (95%). The dialysis sessions, which lasted 4 hours, had a Kt/V value above the recommended K/DOQI target value of 1.3. Median shunt flow was approximately 1 L/min. Residual diuresis was low (median of 250 ml/day), and 39% of the patients were anuric. The median plasma albumin concentration was slightly below the recommended KDOQI target of 40 g/L, although hemoglobin and parathormone levels were within the target range. Plasma  $\beta$ 2-microglobulin concentrations were highly elevated (median concentration of 23.5 mg/L), indicating an accumulation due to reduced renal and low dialysis-driven clearance.

Cardiac comorbidities were present in a large proportion of the patients. Ischemic heart disease was the most frequent condition (31%). Systolic LV dysfunction was found in 26% of all of the patients (table 1).

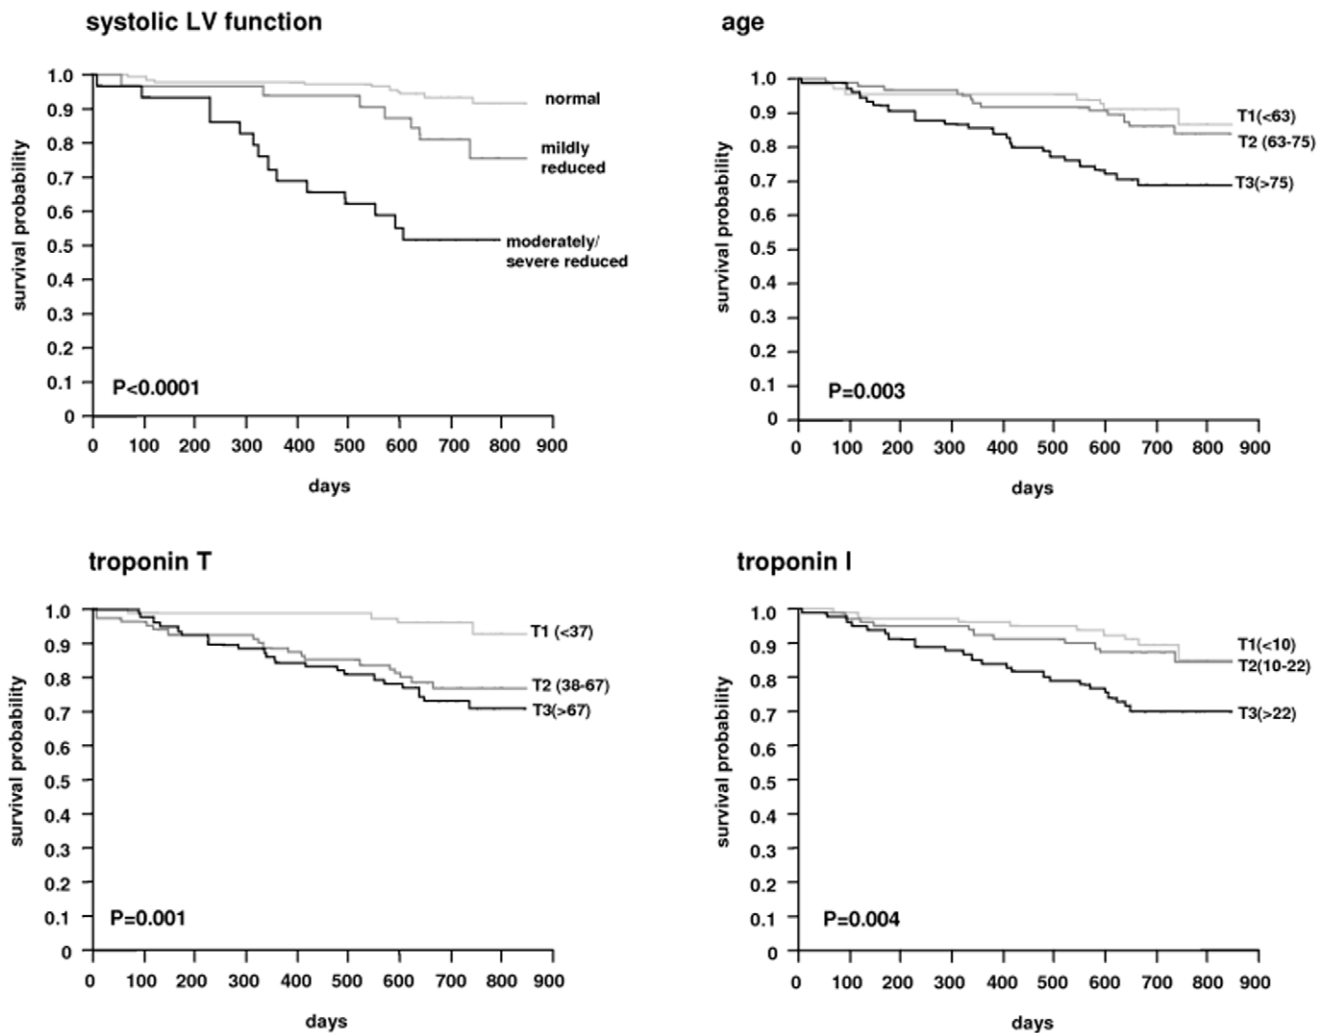

**Figure 4. Survival curves of the cohort stratified according to classes of systolic LV function and tertiles of age, troponin T and troponin I.**

doi:10.1371/journal.pone.0047610.g004

### Plasma troponin concentrations in the cohort

Plasma troponin I or T was detectable with the applied sensitive assays in all of the enrolled patients. The median TnT and TnI concentrations were 49 pg/ml and 14 pg/ml, with an interquartile range of 31 to 73 pg/ml and 7 to 28 pg/ml, respectively (Fig. 1A). The distributions of the plasma troponin concentrations are shown in Figure 1B. A large proportion of patients (95%) had a plasma TnT concentration above the 99<sup>th</sup> percentile at 14 pg/ml, while only 14% of the patients had a plasma TnI concentration above the 99<sup>th</sup> percentile at 40 pg/ml. Expressed as multiples of the 99<sup>th</sup> percentile, the TnT concentration was elevated 3.5 fold (interquartile range: 2.2 to 5.2) compared to 0.4 fold for TnI (interquartile range: 0.2 to 0.7; Figure 1C), which represented a highly significant difference ( $p < 0.0001$ ). Plasma troponin concentrations were moderately correlated with each other ( $r = 0.63$ ,  $p < 0.0001$ ). TnI had a greater variability within the three samples with a variation of  $26 \pm 24\%$  compared to  $8 \pm 8\%$  for TnT.

### Univariate analyses

Table 2 lists the results of univariate correlation analyses of the plasma TnI and TnT concentrations with the collected parameters. Both troponins showed a significant positive correlation with

age, degree of systolic dysfunction, interdialytic weight gain, pulse pressure and parathormone concentration. The troponins were negatively correlated with residual diuresis, diastolic blood pressure and shunt flow. TnT was positively correlated with blood pump speed and C-reactive protein concentrations. There was no correlation with the plasma  $\beta_2$ -microglobulin concentration. Variations in TnT and TnI, expressed as the standard deviation of the three samples obtained from each patient, were not correlated to any of the parameters studied.

### Multivariate analyses

To analyze independent determinants of the plasma TnI and TnT concentrations, multivariate linear regression modeling was performed. The parameters that entered the final model were selected using a stepwise forward approach with a p-value of  $< 0.05$ . Table 3 and Figure 2 show the results of the multivariate linear regression models that were applied. Besides age and gender, the independent determinants of the plasma TnT concentration were systolic LV function, systolic blood pressure, time on dialysis and residual diuresis. The influence of interdialytic weight gain was close to reaching statistical significance ( $p = 0.0688$ ). Overall, the adjusted  $r^2$  of the model was 0.48,

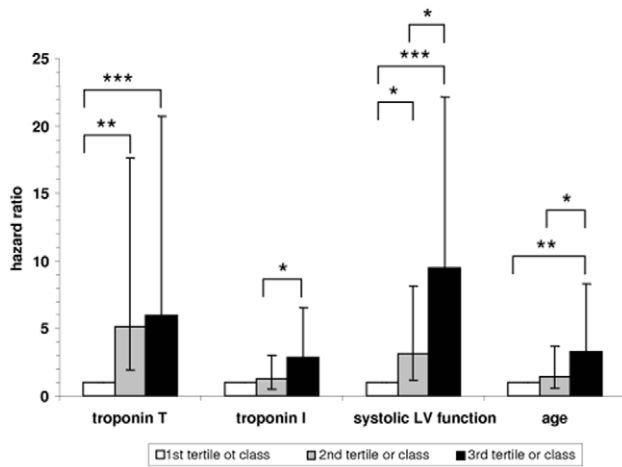

**Figure 5. Hazard ratio of mortality according to tertiles of troponin T (<37; 38–67; >67 pg/ml), troponin I (<10; 10–22; >22 pg/ml), age (<63; 63–75; >75 years) and classes of systolic LV function (1 = normal, 2 = mildly reduced; 3 = moderately and severe reduced).** Error bars represent lower and upper 95% confidence interval. The hazard ratio of the first tertile or class, respectively, was set to 1. \*\*  $p < 0.01$ , \*\*\*  $p < 0.001$ . doi:10.1371/journal.pone.0047610.g005

indicating that 48% of the variability in plasma TnT concentrations could be explained by these factors (Figure 3A). In contrast, the best model for TnI had an adjusted  $r^2$  of 0.32, and age, systolic LV function, pulse pressure, length of time on dialysis and duration of a HD session were independent predictors (Figure 3B).

### Prognostic value

After the initial blood draw, the cohort was followed for survival to analyze the prognostic value of elevated plasma troponin concentrations. During a median follow-up time of 710 days (679; 761), 44 patients died corresponding to an annual mortality rate of 9.2%. Compared to surviving patients, deceased patients were significantly older (77 years [68;82] vs. 69 [59; 76];  $p < 0.0001$ ), were more likely to have LV dysfunction (68% vs. 24%;  $p < 0.0001$ ) and had lower diastolic blood pressure (65 mm Hg [59;72] vs. 69 [63; 74];  $p = 0.0087$ ). They had higher plasma CRP and parathormone concentrations (12.9 mg/L [8.8;20.1] vs. 7.7 [4.2; 13.6];  $p < 0.0001$  and 240 pg/mL [169;431] vs. 203 [124; 326];  $p = 0.0011$ , respectively). Plasma troponin T and I concentrations were also significantly ( $p < 0.0001$ ) higher in deceased patients (67 [46;87] pg/mL and 24 [11;46] pg/mL, respectively) compared to surviving patients (44 [29;70] pg/mL and 13 [7;24] pg/mL, respectively).

The survival curves stratified for tertiles of age, plasma troponin T and I concentrations as well as classes of systolic LV function are shown in Figure 4. The relative risk compared to the first tertile or class is shown in Figure 5. Systolic LV function was the strongest

predictor of death during follow-up, followed by increased plasma troponin T concentration. When analyzing the diagnostic performance of plasma troponin T and I concentrations using contingency tables and receiver-operator curves (Table 4), both troponins showed similar AUC-values, however, plasma troponin T concentration had a higher sensitivity (91%) and negative predictive value (95%) compared to troponin I (61% and 77%, respectively). For each increase of the plasma troponin T or I concentration by 10 pg/ml, the risk ratio was increased by 13.9% and 5.2%, respectively. In a multivariate proportional hazards model with age, systolic function and troponin concentration, only systolic function and age remained independent predictors (data not shown).

### Discussion

This study shows that plasma troponin T concentrations measured using a highly sensitive assay were elevated in the vast majority of the hemodialysis cohort studied and that both cardiac and dialysis-related parameters determined its concentrations. Compared to sensitive troponin I, TnT was elevated in more patients, reflected dialysis-related factors to a greater extent and tended to be a stronger predictor of mortality. This study is in agreement with previous studies of patients without ESRD that showed an association between increased plasma troponin concentrations and impaired systolic function [27,28]. In addition, plasma troponin concentrations were independently associated with dialysis-related parameters, such as time on dialysis, residual diuresis, interdialytic weight gain or duration of a HD session. These factors, which can be termed “dialysis heritage”, are strongly interrelated to each other in that residual function was lost with an increasing time on dialysis, which favors volume overload. Residual function and interdialytic weight gain are both independent risk factors for increased mortality in ESRD patients [24,25]. The association between residual diuresis and plasma troponin concentration has been reported earlier [29].

Most of the studies evaluating plasma troponin concentrations in ESRD patients have investigated the prognostic value and association with mortality. However, only a few studies have addressed the determinants of plasma troponin concentration in ESRD patients. Several studies found that elevated troponin concentrations were associated with the extent of coronary disease [30,31], calcification [32] or left ventricular hypertrophy or dysfunction [33]. Interestingly, in our study shunt flow was negatively correlated with plasma troponin T or I concentrations and was an independent predictor with a borderline statistical significance in the multivariate analysis ( $p = 0.07$ ). Despite the possible detrimental effects of a high shunt flow on the heart [16], our results suggest that a high shunt flow can be interpreted as a sign of better cardiac status as judged by a lower plasma troponin concentration. This also highlights the fact that association studies cannot distinguish between cause and consequence and can be influenced by phenomena such as reverse causation (i.e., a failing

**Table 4. Prognostic performance of the plasma troponin concentration in predicting death during follow-up.**

|            | AUC (c-index) | cut-off, pg/ml | Youden index | sensitivity, % | specificity, % | positive predictive value, % | negative predictive value, % |
|------------|---------------|----------------|--------------|----------------|----------------|------------------------------|------------------------------|
| troponin T | 0.684         | 38             | 0.32         | 91             | 41             | 26                           | 95                           |
| troponin I | 0.665         | 21             | 0.32         | 61             | 70             | 16                           | 77                           |

doi:10.1371/journal.pone.0047610.t004



heart that leads to increased plasma troponin concentrations and low shunt flow).

In studies comparing troponin T to troponin I, ESRD patients were 2–3 times more likely to have elevated concentrations of troponin T than troponin I [34,35]. In this study, TnT was elevated in nearly all of the patients (95%) compared to TnI (14%). This is similar to the findings of Jacobs et al., who found elevations of TnT measured with the high sensitive Roche assay in all of the patients studied whereas TnI measured using a conventional assay was elevated in only 28% of the cases [21]. Using a sensitive troponin I assay and a cut-off point of 35 pg/ml, this proportion was increased to 37% [23]. This difference can be partially explained with our data, which showed a slight accumulation of troponin T during the course of ESRD in that residual diuresis and the length of time on dialysis were independent predictors of the plasma concentration of only TnT, but not TnI. The finding that plasma troponin I concentrations were not influenced by residual renal clearance is in agreement with a study in ESRD patients that showed no differences in the clearance of troponin I after an acute MI [36].

However, there should be caution when interpreting high troponin T values as mere accumulation [5,37]. Elevated troponin T and troponin I concentrations are both strong predictors of mortality. Accumulation of troponin T can only occur following release after myocyte damage and should be regarded as a pathologic finding in any ESRD patients. Furthermore, accumulation can only occur when residual renal function declines, which is a strong predictor of survival in hemodialysis patients [38]. Therefore, plasma troponin T concentrations provide information about cardiac release and dialysis heritage, which might explain the improved prognostic value of troponin T compared to troponin I, as seen in our study or in the study of Jacobs et al. [18,20].

A more meaningful cut-off point than the 99<sup>th</sup> percentile would be levels that are linked to an increased mortality risk. We found that a plasma troponin T concentration above 38 pg/mL which is roughly three-times the 99<sup>th</sup> percentile was associated with a 5-fold risk of death during 2 years of follow-up. In contrast, we could not find a clear cut-off for troponin I as the association with death was more gradual. So far, only one study reported the association of hs TnT with mortality and found reduced survival rates at levels above 24.15 pg/ml [22]. In our study, both troponins were not independent predictors of death such as age or systolic LV function and did not add prognostic information. However, they

can be used as alternative markers to identify patients at risk when echocardiography or other cardiac workup is not available. Additional studies are needed to clarify the diagnostic value of sensitive TnT and sensitive TnI in terms of mortality and risk stratification in ESRD patients.

On average, patients in this cohort had a TnT value that was 3.5-fold greater than the 99<sup>th</sup> percentile. Given these elevated baseline values, acute MI can only be diagnosed or ruled out when one or more subsequent samples show a significant rise or fall. Sensitive troponin I offers advantages in this respect, as the plasma concentration of a minority of the patients (14%) was above the 99<sup>th</sup> percentile.

The study is limited by the paucity of cardiac parameters that were collected, which might have contributed to an unexplained variability of roughly 70% and 50% in plasma troponin I and troponin T concentrations during multivariate modeling. Survival analyses might be limited by the low mortality during the follow-up period. This study focused on nephrological parameters that are commonly available and accessible during hemodialysis treatment, such residual diuresis or shunt flow. Systolic left ventricular function served as a surrogate for cardiac status and showed a high correlation to the plasma troponin concentration. Other cardiac morbidities, such as valvular disease or atrial fibrillation were also contributors of the plasma troponin concentration. Again it should be emphasized that association studies cannot prove causality between the studied parameters and elevated troponin concentrations and cannot distinguish between cause and consequence.

In summary, elevations of plasma troponin concentrations in hemodialysis patients measured with sensitive assays are influenced by cardiac function and dialysis-related parameters. Both are strong predictors of mortality in the short-term and are useful markers to identify patients at risk, however, troponin T is more retained during ESRD compared to troponin I.

## Acknowledgments

We thank Andrea Janessa, Claudia Stelzig, Boris Huegle, MD & M.Sc. and Aline Naumann for their valuable assistance during the study.

## Author Contributions

Conceived and designed the experiments: FA BF. Analyzed the data: HUH TB RT CT PW. Contributed reagents/materials/analysis tools: AP. Wrote the paper: FA BF CM.

## References

1. Wu AH, Ford L (1999) Release of cardiac troponin in acute coronary syndromes: ischemia or necrosis? *Clin Chim Acta* 284: 161–174.
2. Thygesen K, Alpert JS, White HD (2007) Universal definition of myocardial infarction. *Eur Heart J* 28: 2525–2538.
3. Freda BJ, Tang WH, Van Lente F, Peacock WF, Francis GS (2002) Cardiac troponins in renal insufficiency: review and clinical implications. *J Am Coll Cardiol* 40: 2065–2071.
4. Artunc F, Haap M, Heyne N, Weyrich P, Wolf S (2010) [Interpretation of elevated serum troponin levels in end stage renal disease – case 2/2010]. *Dtsch Med Wochenschr* 135: 240.
5. Katus HA, Haller C, Muller-Bardorff M, Scheffold T, Rempis A (1995) Cardiac troponin T in end-stage renal disease patients undergoing chronic maintenance hemodialysis. *Clin Chem* 41: 1201–1203.
6. Porter GA, Norton T, Bennett WB (1998) Troponin T, a predictor of death in chronic haemodialysis patients. *Eur Heart J* 19 Suppl N: N34–N37.
7. Stolar JC, Georges B, Shita A, Verbeelen D (1999) The predictive value of cardiac troponin T measurements in subjects on regular haemodialysis. *Nephrol Dial Transplant* 14: 1961–1967.
8. Dierkes J, Domrose U, Westphal S, Ambrosch A, Bosselmann HP, et al. (2000) Cardiac troponin T predicts mortality in patients with end-stage renal disease. *Circulation* 102: 1964–1969.
9. Apple FS, Murakami MM, Pearce LA, Herzog CA (2002) Predictive value of cardiac troponin I and T for subsequent death in end-stage renal disease. *Circulation* 106: 2941–2945.
10. Mallamaci F, Zoccali C, Parlongo S, Tripepi G, Benedetto FA, et al. (2002) Troponin is related to left ventricular mass and predicts all-cause and cardiovascular mortality in hemodialysis patients. *Am J Kidney Dis* 40: 68–75.
11. Khan NA, Hemmelgarn BR, Tonelli M, Thompson CR, Levin A (2005) Prognostic value of troponin T and I among asymptomatic patients with end-stage renal disease: a meta-analysis. *Circulation* 112: 3088–3096.
12. Wang AY, Lai KN (2008) Use of cardiac biomarkers in end-stage renal disease. *J Am Soc Nephrol* 19: 1643–1652.
13. Diris JH, Hackeng CM, Kooman JP, Pinto YM, Hermens WT, et al. (2004) Impaired renal clearance explains elevated troponin T fragments in hemodialysis patients. *Circulation* 109: 23–25.
14. Bodor GS, Survant L, Voss EM, Smith S, Porterfield D, et al. (1997) Cardiac troponin T composition in normal and regenerating human skeletal muscle. *Clin Chem* 43: 476–484.
15. Zumrutdal A, Bakinen O, Ucan H, Atalay HV, Bodur H (2000) Relationship between uremic myopathy and false-positive cardiac troponin T test. *Nephron* 86: 522–523.
16. London GM (2002) Left ventricular alterations and end-stage renal disease. *Nephrol Dial Transplant* 17 Suppl 1: 29–36.



17. Breidthardt T, McIntyre CW (2011) Dialysis-induced myocardial stunning: the other side of the cardiorenal syndrome. *Rev Cardiovasc Med* 12: 13–20.
18. Apple FS (2009) A new season for cardiac troponin assays: it's time to keep a scorecard. *Clin Chem* 55: 1303–1306.
19. Reichlin T, Hochholzer W, Bassetti S, Steuer S, Stelzig C, et al. (2009) Early diagnosis of myocardial infarction with sensitive cardiac troponin assays. *N Engl J Med* 361: 858–867.
20. Keller T, Munzel T, Blankenberg S (2011) Making it more sensitive: the new era of troponin use. *Circulation* 123: 1361–1363.
21. Jacobs LH, van de KJ, Mingels AM, Kleijnen VW, van der Sande FM, et al. (2009) Haemodialysis patients longitudinally assessed by highly sensitive cardiac troponin T and commercial cardiac troponin T and cardiac troponin I assays. *Ann Clin Biochem* 46: 283–290.
22. McGill D, Talaulikar G, Potter JM, Koerbin G, Hickman PE (2010) Over time, high-sensitivity TnT replaces NT-proBNP as the most powerful predictor of death in patients with dialysis-dependent chronic renal failure. *Clin Chim Acta* 411: 936–939.
23. Kumar N, Michelis MF, DeVita MV, Panagopoulos G, Rosenstock JL (2011) Troponin I levels in asymptomatic patients on haemodialysis using a high-sensitivity assay. *Nephrol Dial Transplant* 26: 665–670.
24. van der Wal WM, Noordzij M, Dekker FW, Boeschoten EW, Krediet RT, et al. (2011) Full loss of residual renal function causes higher mortality in dialysis patients; findings from a marginal structural model. *Nephrol Dial Transplant*.
25. Kalantar-Zadeh K, Regidor DL, Kovesdy CP, Van Wyck D, Bunnapradist S, et al. (2009) Fluid retention is associated with cardiovascular mortality in patients undergoing long-term hemodialysis. *Circulation* 119: 671–679.
26. Evrin PE, Wibell L (1972) The serum levels and urinary excretion of 2 - microglobulin in apparently healthy subjects. *Scand J Clin Lab Invest* 29: 69–74.
27. Peacock WF, De Marco T, Fonarow GC, Diercks D, Wynne J, et al. (2008) Cardiac troponin and outcome in acute heart failure. *N Engl J Med* 358: 2117–2126.
28. Horwich TB, Patel J, MacLellan WR, Fonarow GC (2003) Cardiac troponin I is associated with impaired hemodynamics, progressive left ventricular dysfunction, and increased mortality rates in advanced heart failure. *Circulation* 108: 833–838.
29. Fernandez-Reyes MJ, Mon C, Heras M, Guevara P, Garcia MC, et al. (2004) Predictive value of troponin T levels for ischemic heart disease and mortality in patients on hemodialysis. *J Nephrol* 17: 721–727.
30. deFilippi C, Wasserman S, Rosanio S, Tiblier E, Sperger H, et al. (2003) Cardiac troponin T and C-reactive protein for predicting prognosis, coronary atherosclerosis, and cardiomyopathy in patients undergoing long-term hemodialysis. *JAMA* 290: 353–359.
31. Hayashi T, Obi Y, Kimura T, Iio K, Sumitsuji S, et al. (2008) Cardiac troponin T predicts occult coronary artery stenosis in patients with chronic kidney disease at the start of renal replacement therapy. *Nephrol Dial Transplant* 23: 2936–2942.
32. Jung HH, Ma KR, Han H (2004) Elevated concentrations of cardiac troponins are associated with severe coronary artery calcification in asymptomatic haemodialysis patients. *Nephrol Dial Transplant* 19: 3117–3123.
33. Mallamaci F, Zoccali C, Parlongo S, Tripepi G, Benedetto FA, et al. (2002) Diagnostic value of troponin T for alterations in left ventricular mass and function in dialysis patients. *Kidney Int* 62: 1884–1890.
34. Kanderian AS, Francis GS (2006) Cardiac troponins and chronic kidney disease. *Kidney Int* 69: 1112–1114.
35. Hickman PE, Koerbin G, Southcott E, Tate J, Dimeski G, et al. (2007) Newer cardiac troponin I assays have similar performance to troponin T in patients with end-stage renal disease. *Ann Clin Biochem* 44: 285–289.
36. Ellis K, Dreisbach AW, Lertora JL (2001) Plasma elimination of cardiac troponin I in end-stage renal disease. *South Med J* 94: 993–996.
37. Giannitsis E, Katus HA (2004) Troponin T release in hemodialysis patients. *Circulation* 110: e25–e26.
38. Termorshuizen F, Dekker FW, van Manen JG, Korevaar JC, Boeschoten EW, et al. (2004) Relative contribution of residual renal function and different measures of adequacy to survival in hemodialysis patients: an analysis of the Netherlands Cooperative Study on the Adequacy of Dialysis (NECOSAD)-2. *J Am Soc Nephrol* 15: 1061–1070.
